# Supplementary material
Source: PubMed Central journal article supplement (PMC10991089)
Supplement: 262_2020_2676_MOESM1_ESM.pdf [file 262_2020_2676_MOESM1_ESM.pdf]

| <b>Supplementary Table S1 : Antibodies for flow cytometry used in the present study</b> |                                |              |                    |                                                       |                       |
|-----------------------------------------------------------------------------------------|--------------------------------|--------------|--------------------|-------------------------------------------------------|-----------------------|
| <b>Antibody</b>                                                                         | <b>Company</b>                 | <b>Clone</b> | <b>Conjugation</b> | <b>Dilution</b><br>( $\mu\text{l}/10^6\text{cells}$ ) | <b>Catalog number</b> |
| CD11c mAb                                                                               | BD Biosciences (San Diego, CA) | B-ly6        | PE                 | 5                                                     | 560999                |
| CD14 mAb                                                                                | BD Biosciences                 | M5E2         | PC                 | 5                                                     | 561708                |
| CD163 mAb                                                                               | Biolegend (San Diego, CA)      | GHI/61       | APC-Cy7            | 5                                                     | 333621                |
| CD309 (VEGFR2) mAb                                                                      | Biolegend                      | Avas 12      | PE-Cy7             | 5                                                     | 359911                |
