# Supplementary material
Source: PubMed Central journal article supplement (PMC10991089)
Supplement: 262_2020_2676_MOESM2_ESM.pdf [file 262_2020_2676_MOESM2_ESM.pdf]

| <b>Supplementary Table S2 : Antibodies for western blotting used in the present study</b> |                                                |                       |                 |
|-------------------------------------------------------------------------------------------|------------------------------------------------|-----------------------|-----------------|
| <b>Antibody</b>                                                                           | <b>Company</b>                                 | <b>Catalog number</b> | <b>Dilution</b> |
| Akt (total-Akt) mAb                                                                       | Cell Signaling Technology, Inc. (Danvers, MA)  | 4691S                 | 1:1000          |
| phospho-Akt (p-Akt) mAb                                                                   | Cell Signaling Technology, Inc.                | 4060S                 | 1:1000          |
| p44/42 MAPK (total-Erk1/2) mAb                                                            | Cell Signaling Technology, Inc.                | 4695S                 | 1:1000          |
| phospho-p44/42 MAPK (p-Erk1/2) mAb                                                        | Cell Signaling Technology, Inc.                | 4370S                 | 1:1000          |
| $\beta$ -actin mAb                                                                        | Santa Cruz Biotechnology, Inc. (Dallas, Texas) | sc-69879              | 1:2000          |
| HRP-linked anti-rabbit antibody                                                           | Cell Signaling Technology, Inc.                | 7074S                 | 1:2000          |
| HRP-linked anti-mouse antibody                                                            | Santa Cruz Biotechnology, Inc.                 | 7076S                 | 1:2500          |

:
