# Supplementary material
Source: PubMed Central journal article supplement (PMC10991089)
Supplement: 262_2020_2676_MOESM3_ESM.pdf [file 262_2020_2676_MOESM3_ESM.pdf]

**Supplementary Table S3** Patient and tumor characteristics

| No. | Age | Sex | Diagnosis | <i>T</i> | <i>N</i> | <i>M</i> | Stage | Pathology |
|-----|-----|-----|-----------|----------|----------|----------|-------|-----------|
| 1   | 65  | M   | R         | 4b       | 2b       | 0        | IIIc  | tub1      |
| 2   | 66  | F   | S         | 4b       | 0        | 1a       | IVa   | tub2      |
| 3   | 63  | M   | S         | 3        | 1b       | 0        | IIIb  | tub1      |
| 4   | 53  | F   | S         | 4b       | 0        | 1c1      | IVc   | tub1-2    |
| 5   | 72  | M   | S         | 3        | 0        | 0        | IIa   | tub2      |
| 6   | 71  | M   | C         | 2        | 0        | 0        | I     | tub1      |
| 7   | 82  | M   | T         | 3        | 0        | 0        | IIa   | muc       |
| 8   | 72  | M   | R         | 3        | 0        | 0        | IIa   | tub2      |
| 9   | 62  | M   | R         | 3        | 1        | 0        | IIIb  | tub1      |
| 10  | 60  | M   | R         | 1b       | 0        | 0        | I     | tub1      |
| 11  | 74  | M   | A         | 2        | 1a       | 0        | IIIa  | tub2      |
| 12  | 78  | F   | T         | 4a       | 0        | 0        | IIb   | tub1      |
| 13  | 63  | M   | R         | 3        | 0        | 0        | IIa   | tub1      |
| 14  | 71  | F   | C         | 2        | 0        | 0        | I     | tub1      |
| 15  | 81  | M   | T         | 4a       | 0        | 0        | IIb   | tub2      |
| 16  | 72  | M   | S         | 4a       | 1b       | 1a       | IVa   | tub1      |
| 17  | 75  | M   | R         | 3        | 0        | 0        | IIa   | tub2      |
| 18  | 78  | M   | T         | 2        | 0        | 0        | I     | tub1      |
| 19  | 78  | M   | R         | 2        | 0        | 0        | I     | tub2      |
| 20  | 77  | F   | A         | 1b       | 0        | 0        | I     | tub2      |

C, cecum; A, ascending colon; T, transverse colon; S, sigmoid colon; R, rectum.

Tumor, lymph node metastasis, distant metastasis, and stage were according to the Japanese Classification of Colorectal, Appendiceal, and Anal Carcinoma (9th edition).
